# Supplementary material for: Antagonists of the serotonin receptor 5A target human breast tumor initiating cells
Source: PubMed Central journal article supplement (PMC7404930; doi:10.1186/s12885-020-07193-6), 2020-08-05

# MCF-7 Figure 3 D-E

## Blot 1

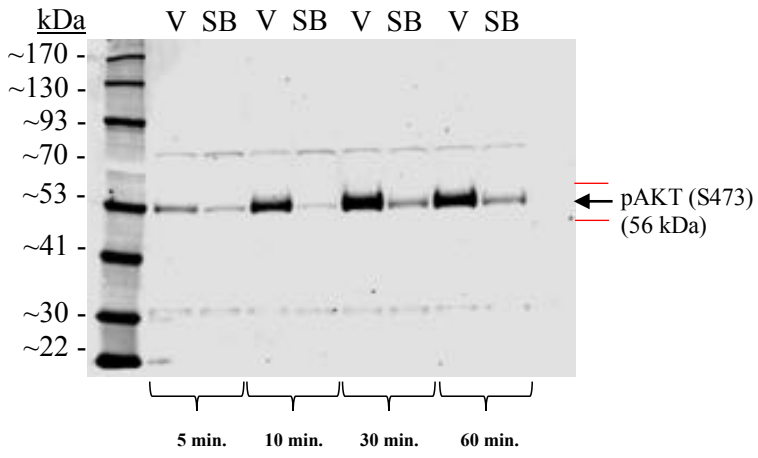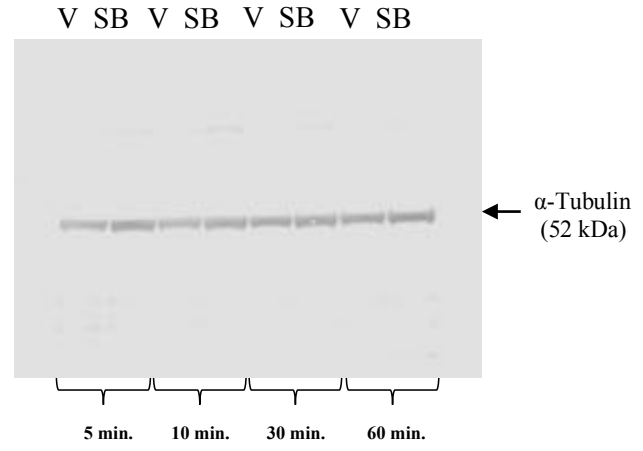

## Blot 2

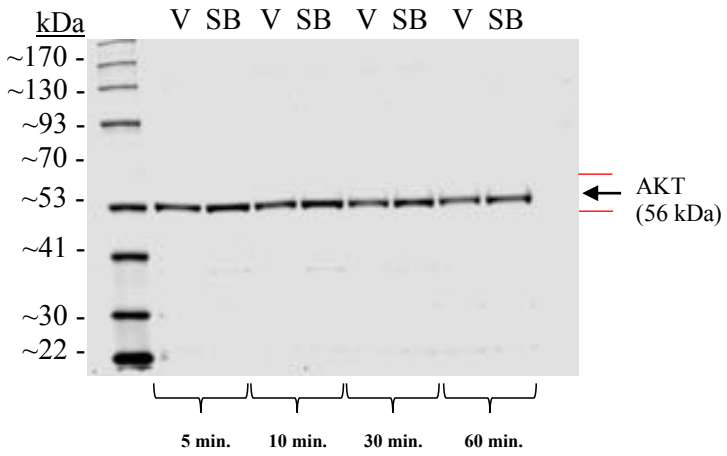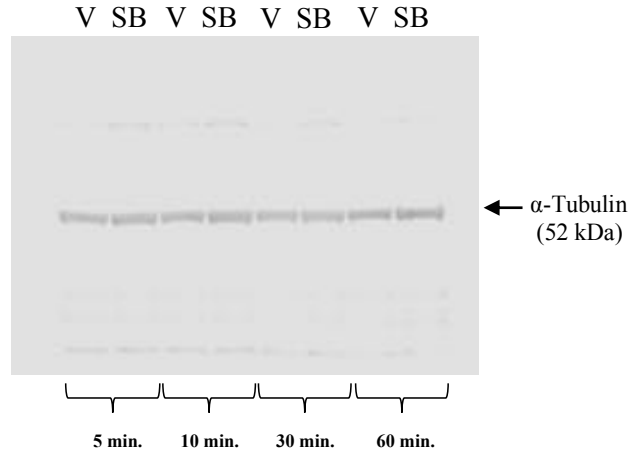

## Blot 3

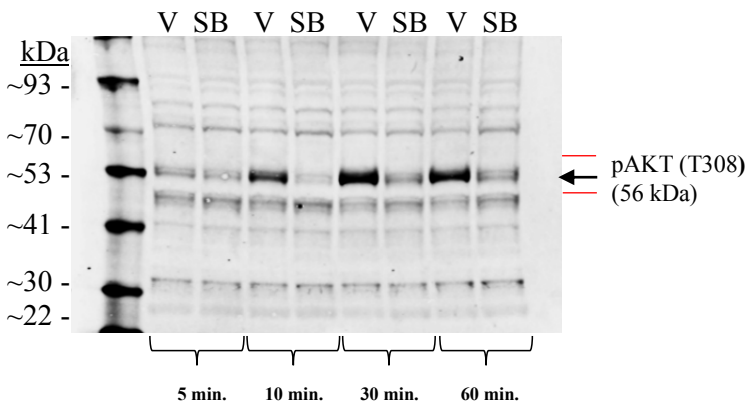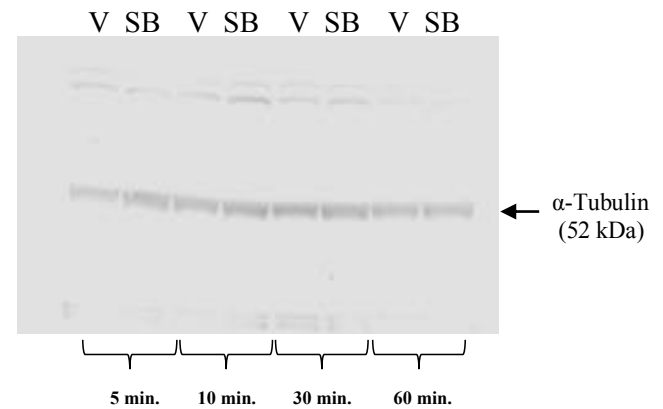

### Blot 4

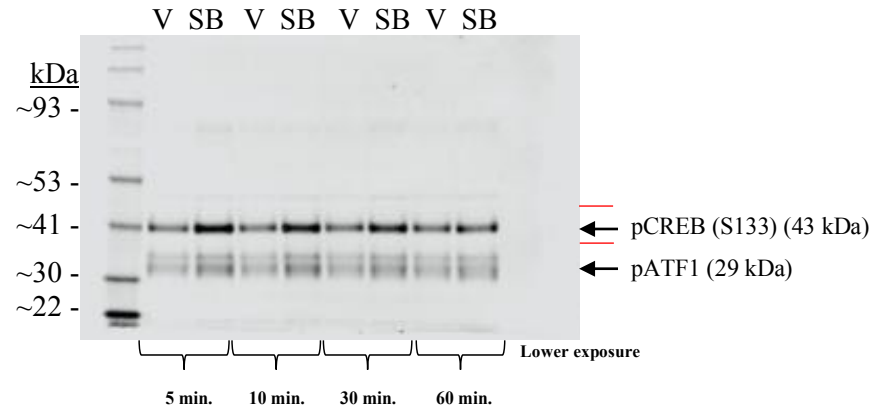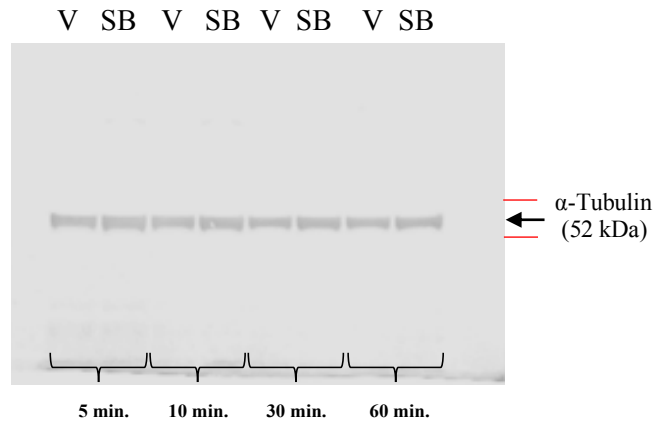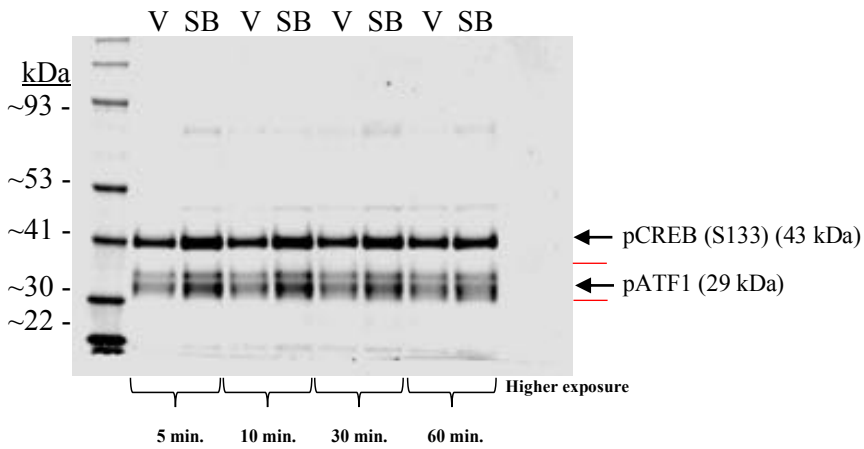

### Blot 5

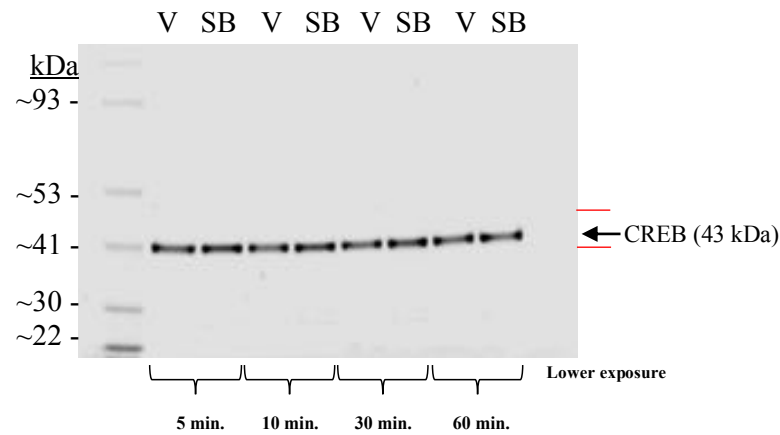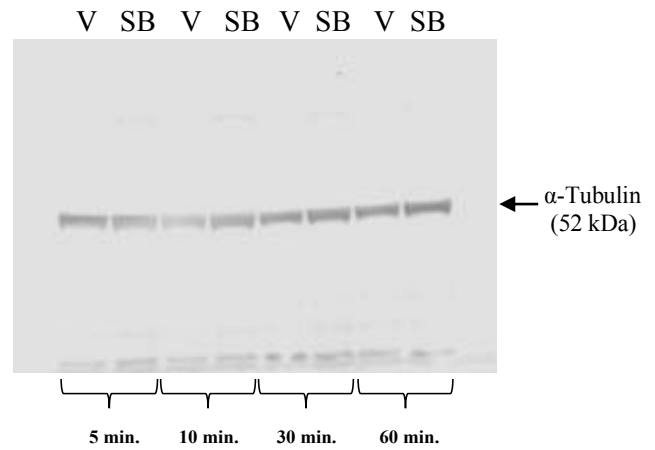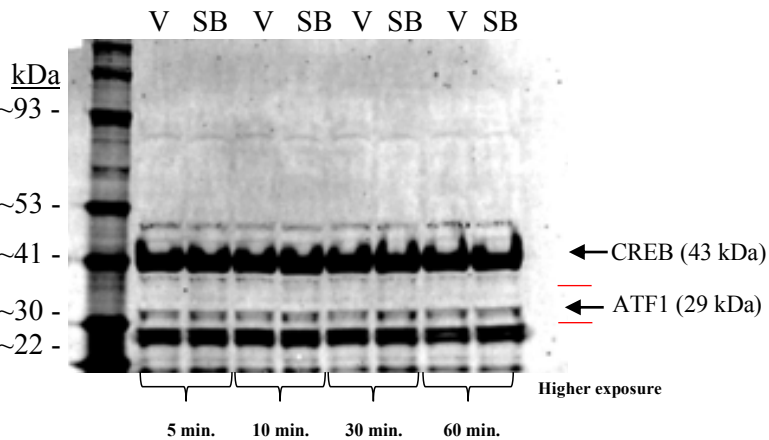

### Blot 6

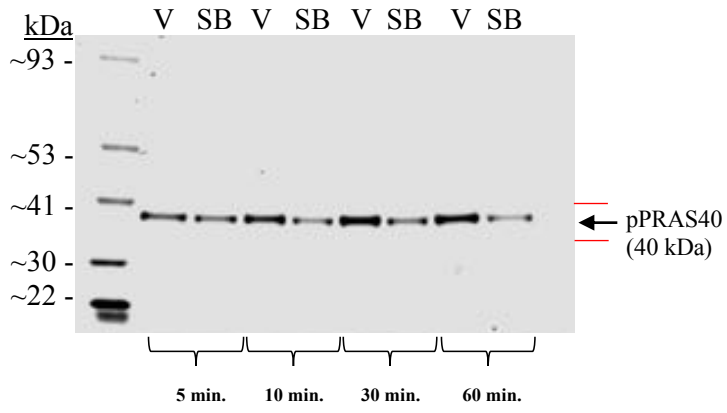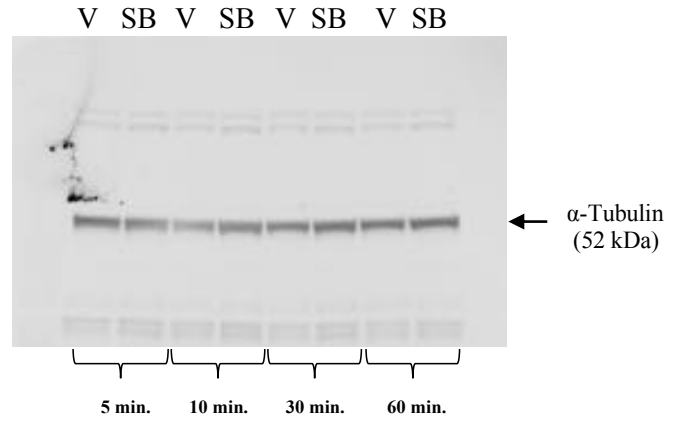

### Blot 7

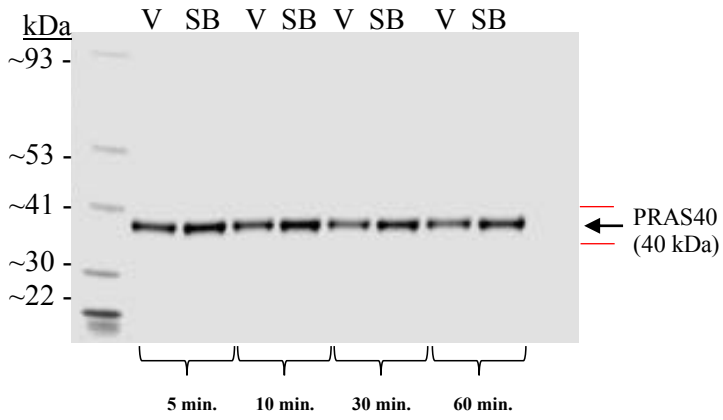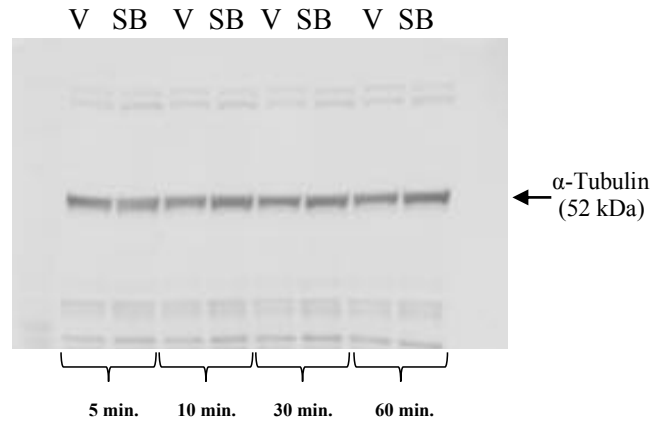

### Blot 8

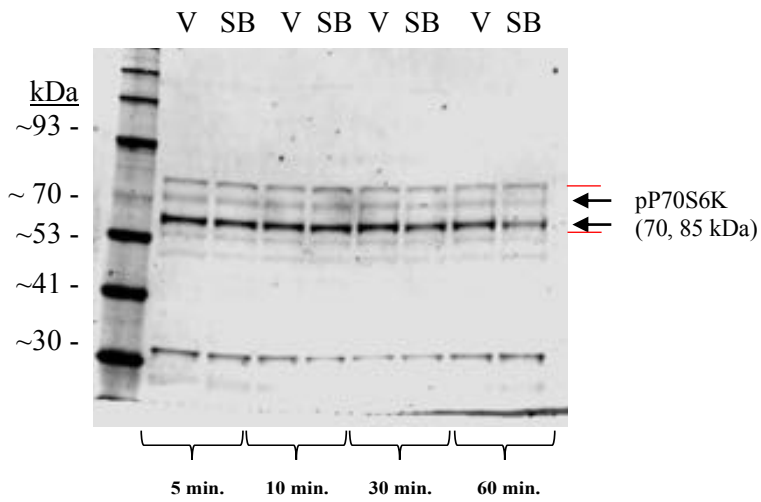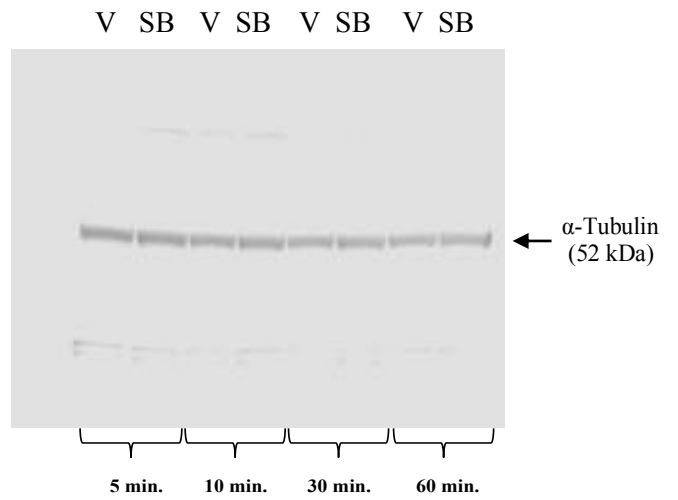

**Blot 9**

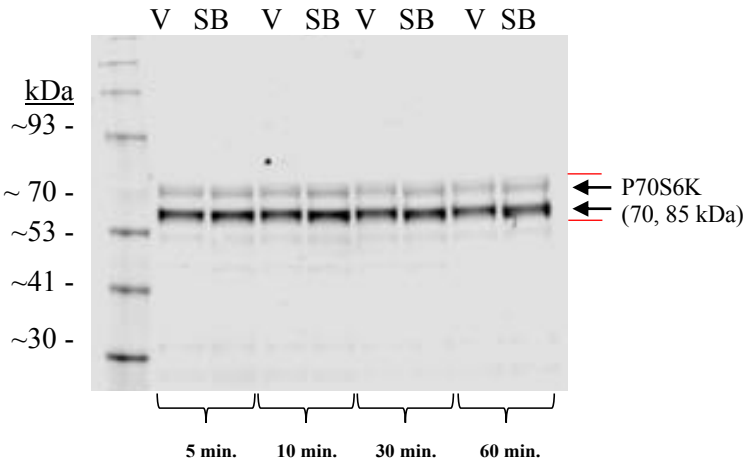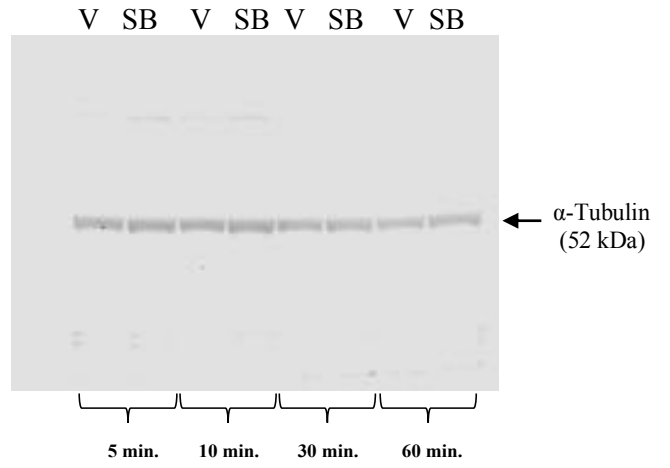

**MDA-MB-157 Figure 3D-E**

**Blot 10**

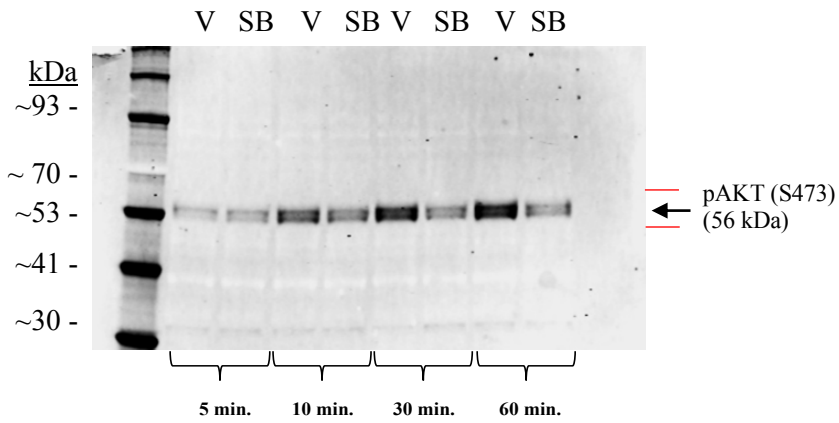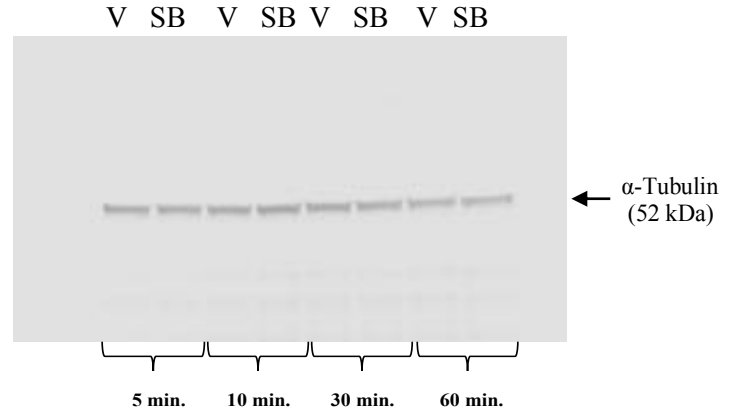

**Blot 11**

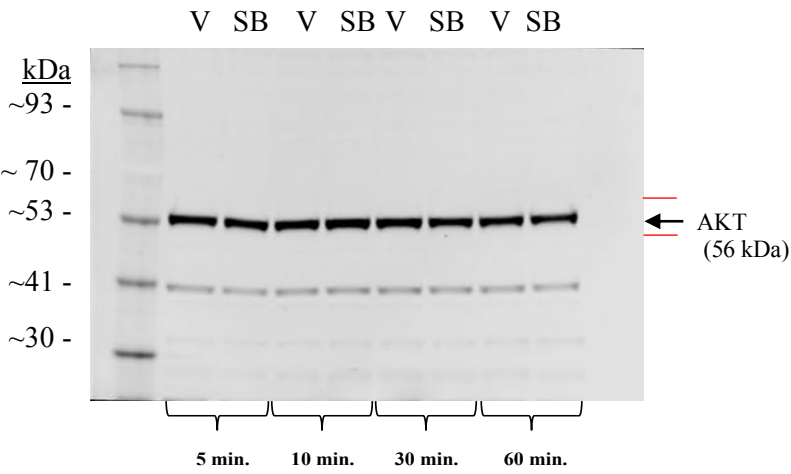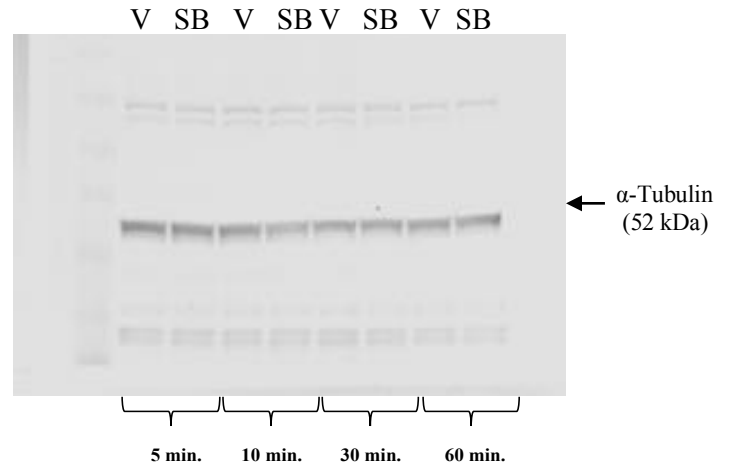

**Blot 12**

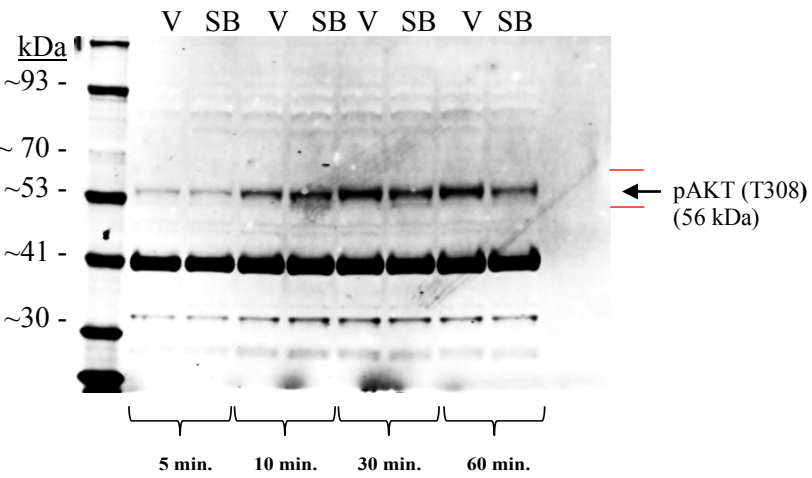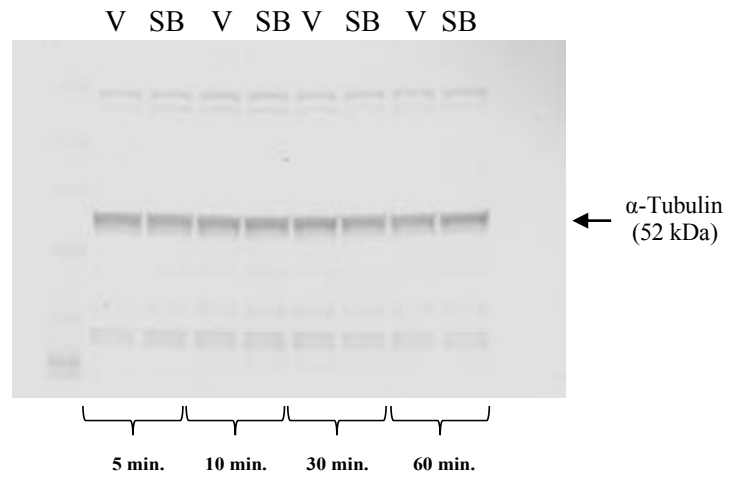

**Blot13**

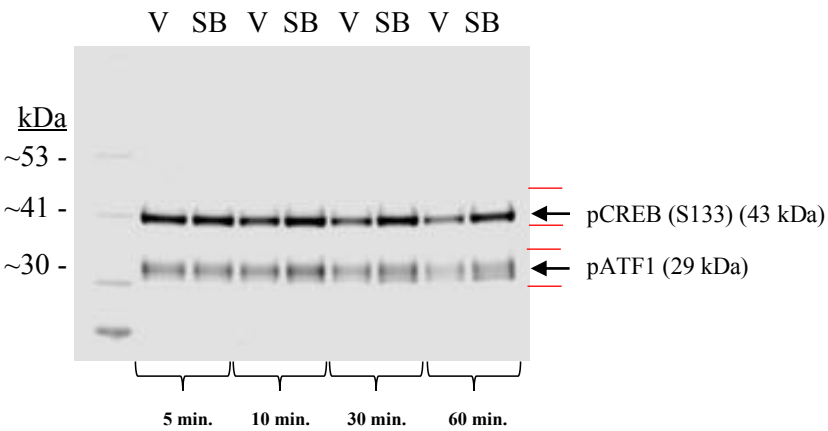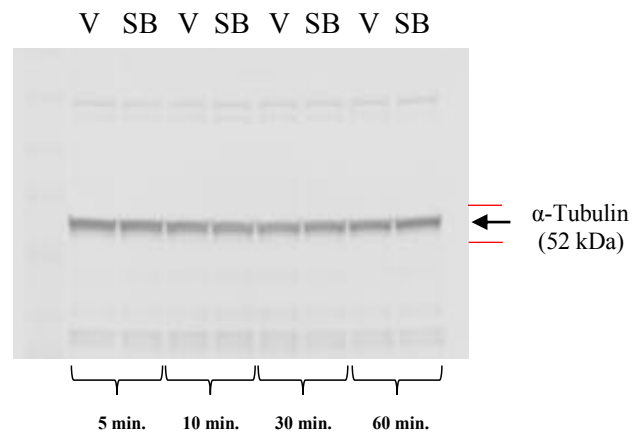

**Blot14**

V SB V SB V SB V SB

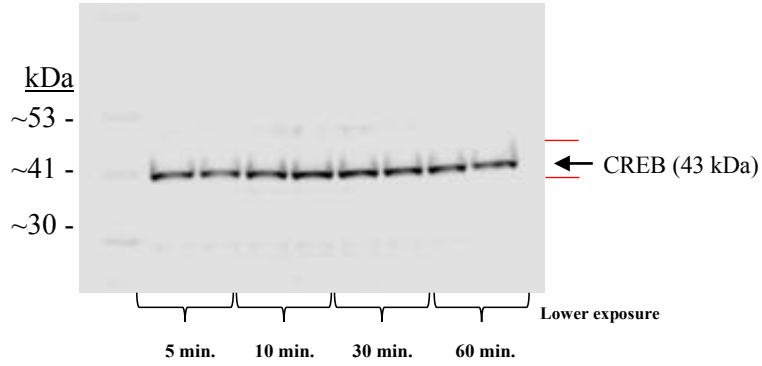

V SB V SB V SB V SB

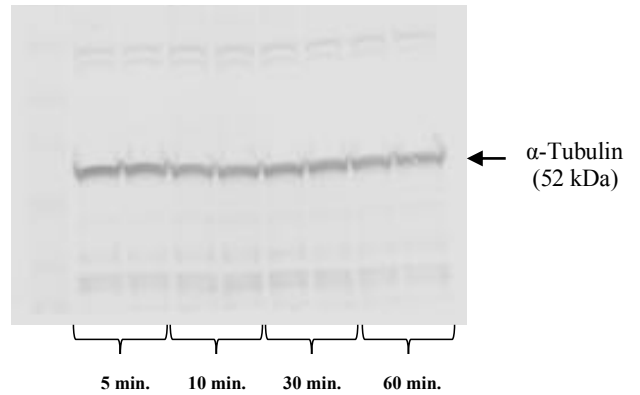

V SB V SB V SB V SB

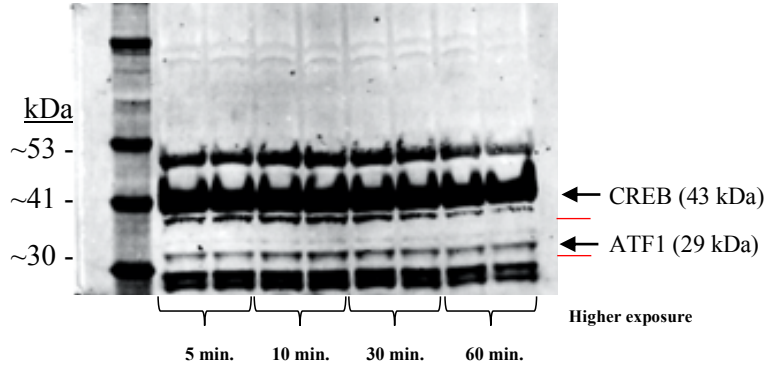

**Blot15**

V SB V SB V SB V SB

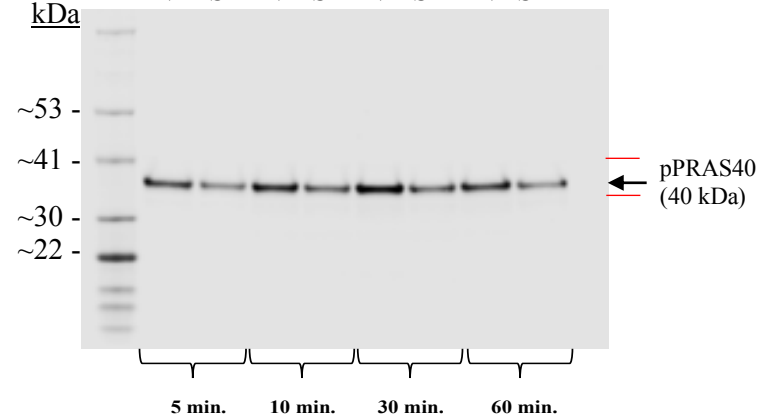

V SB V SB V SB V SB

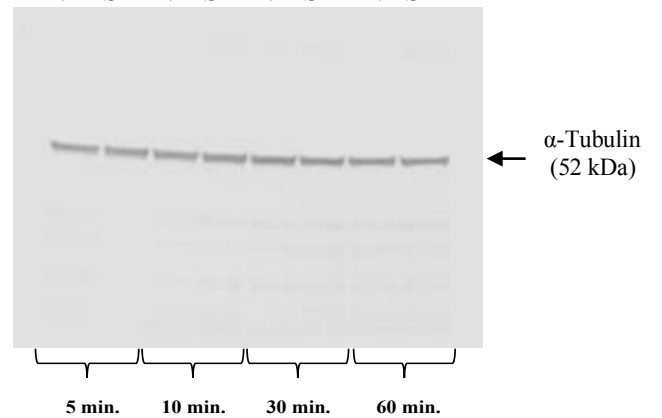

**Blot16**

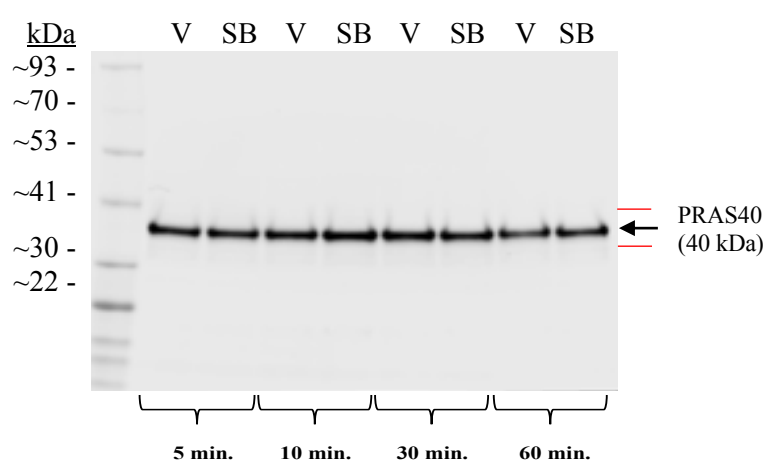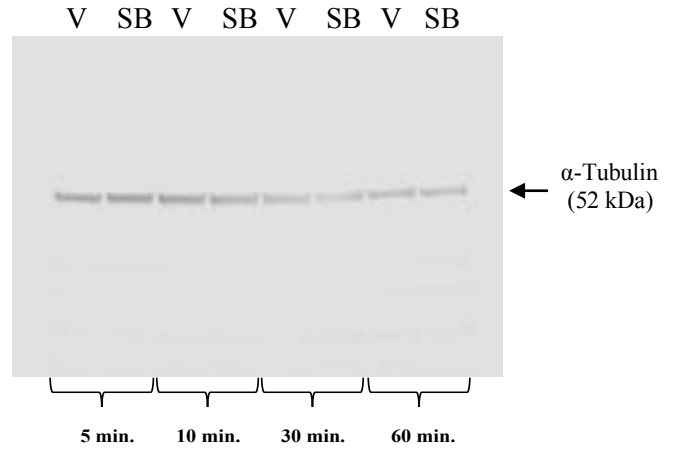

**Blot17**

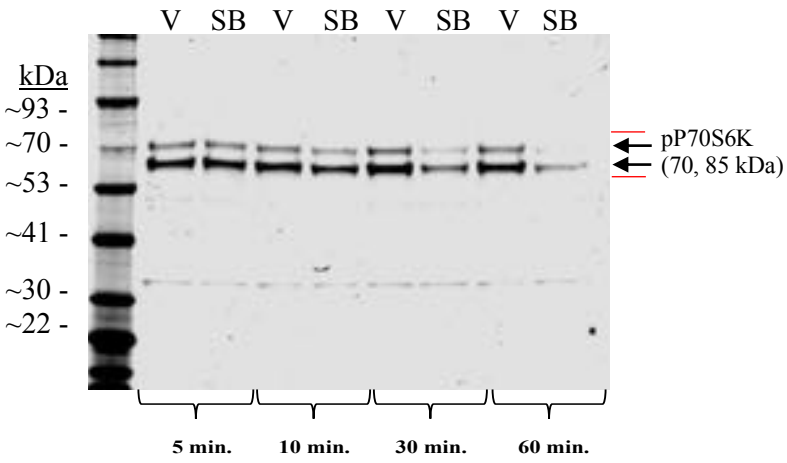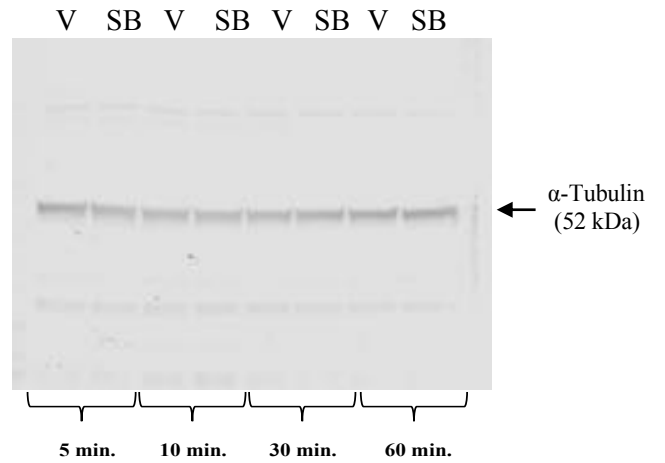

**Blot18**

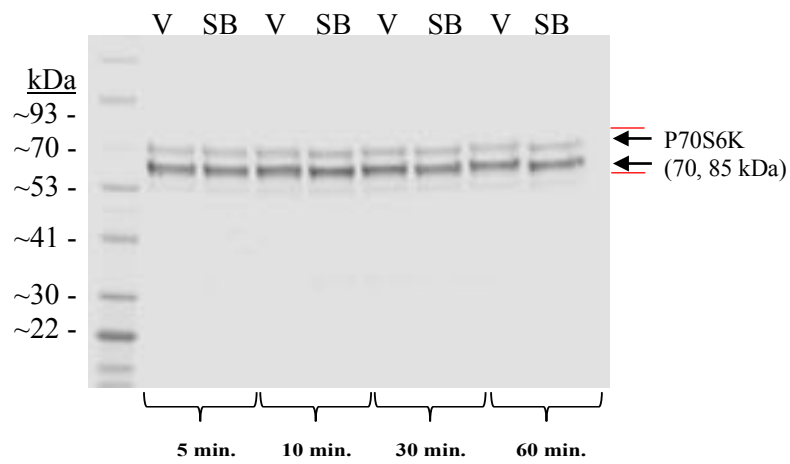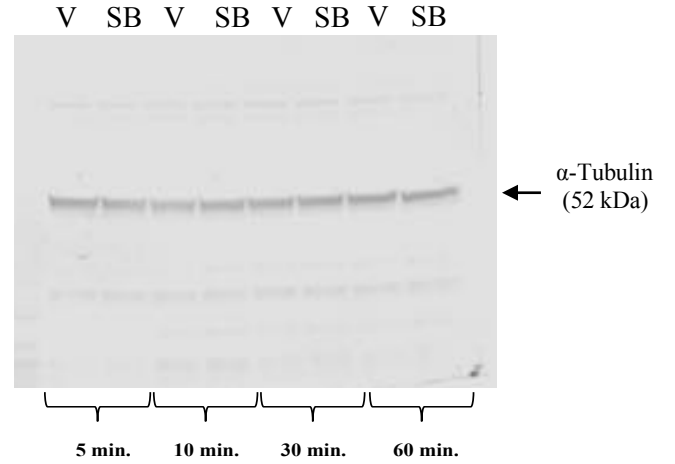

# MCF-7 Figure 3F-G

## Blot19

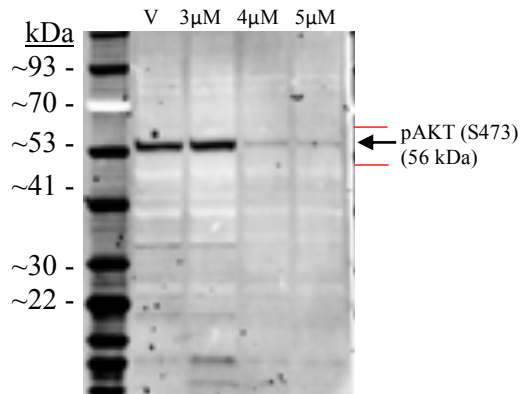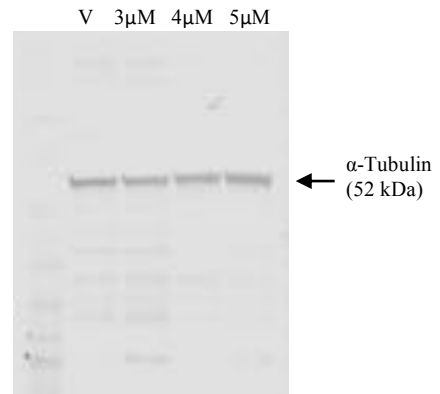

## Blot20

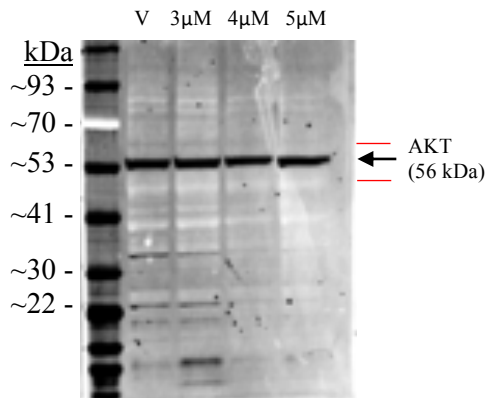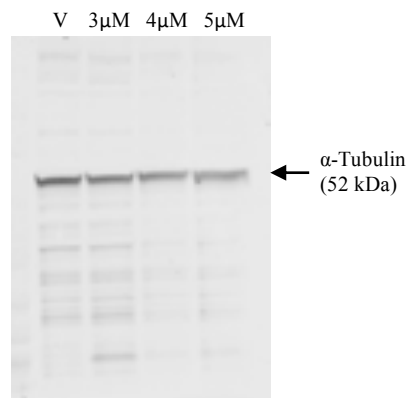

## Blot21

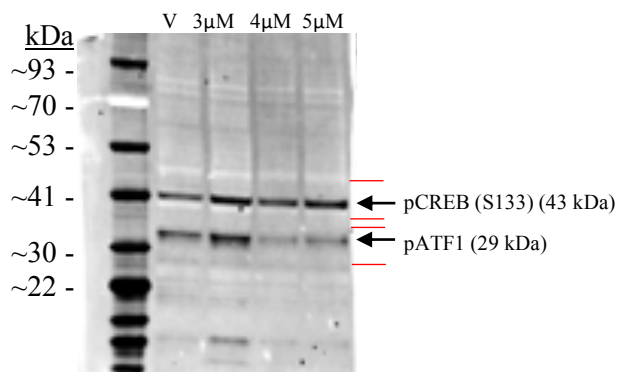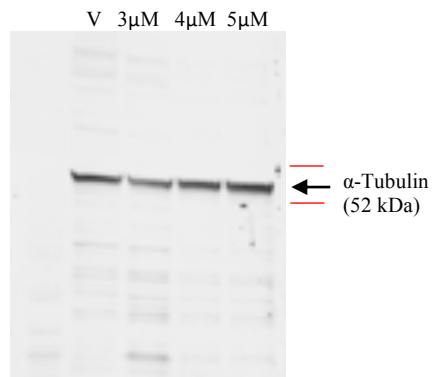



### Blot22

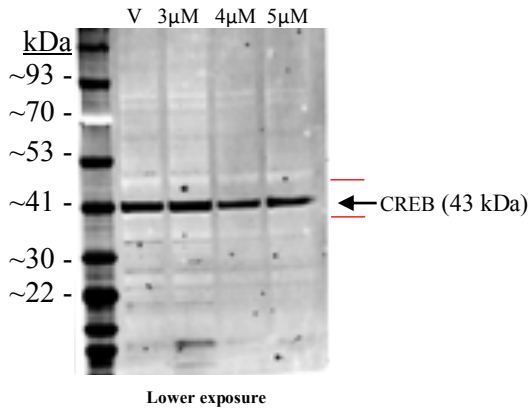

Lower exposure

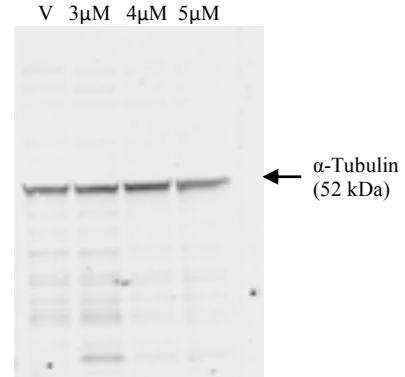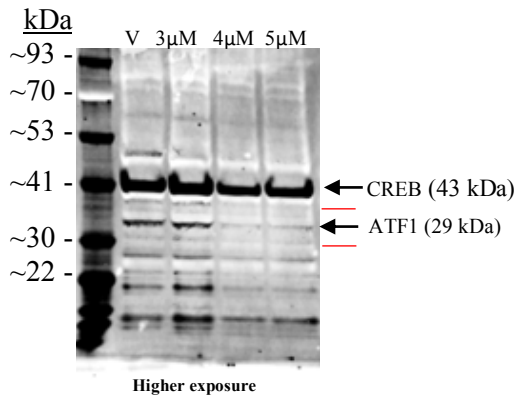

Higher exposure

### Blot23

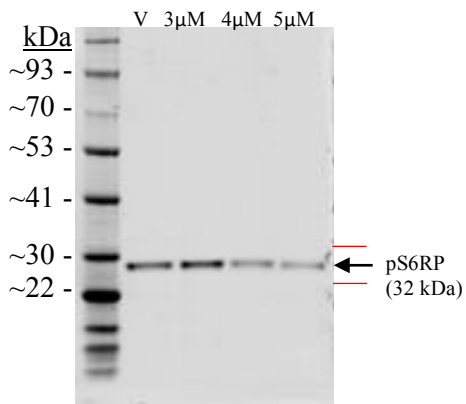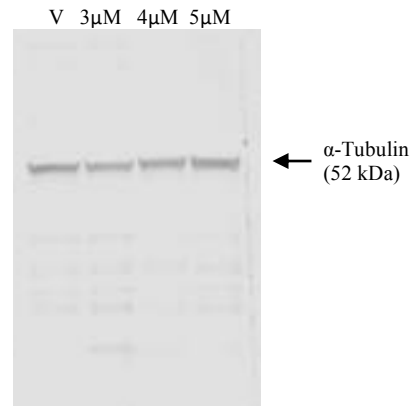

### Blot24

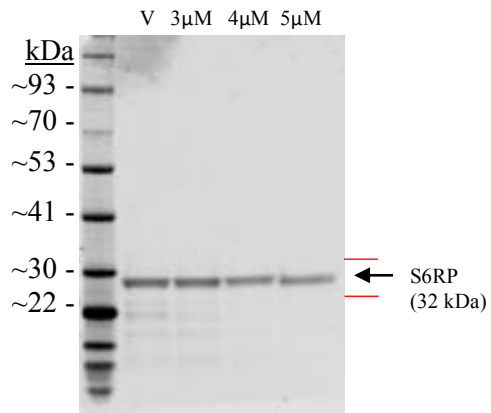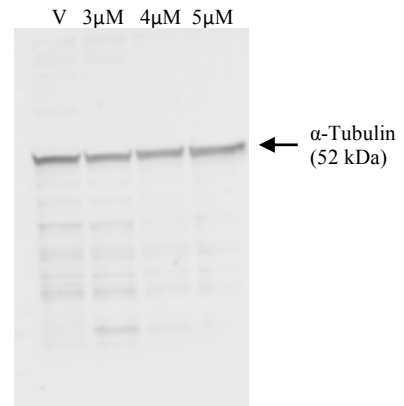

### Blot25

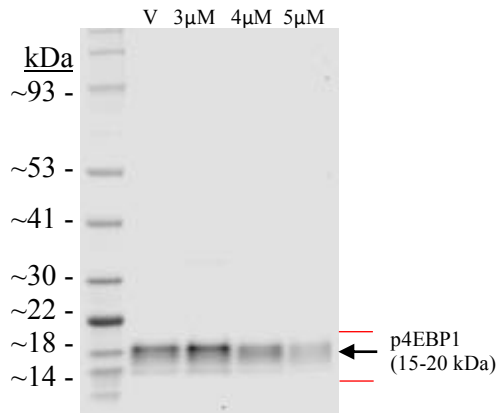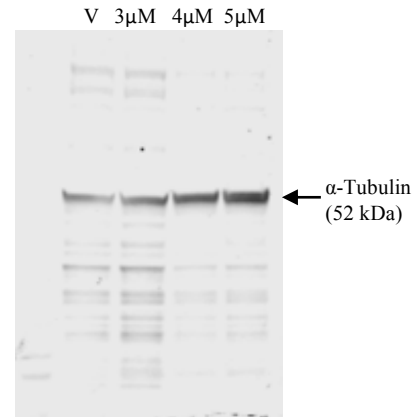

### Blot26

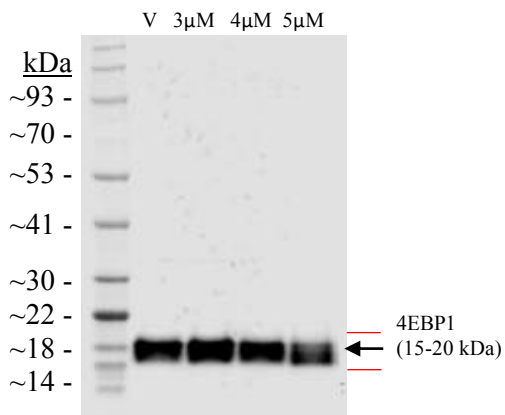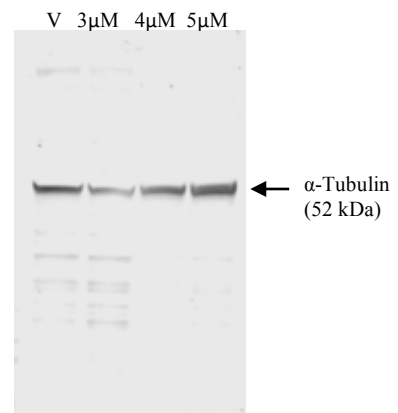

### Blot27

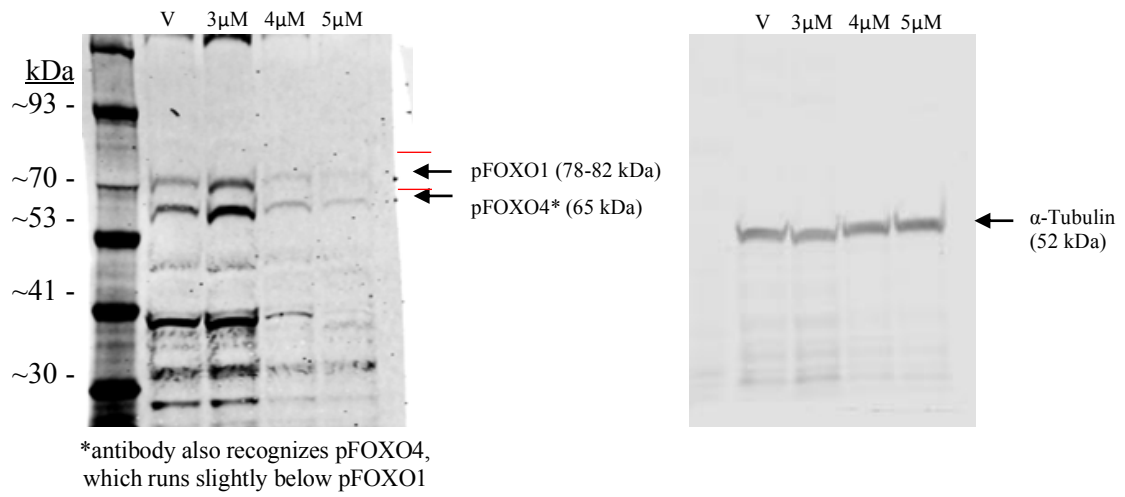

### Blot28

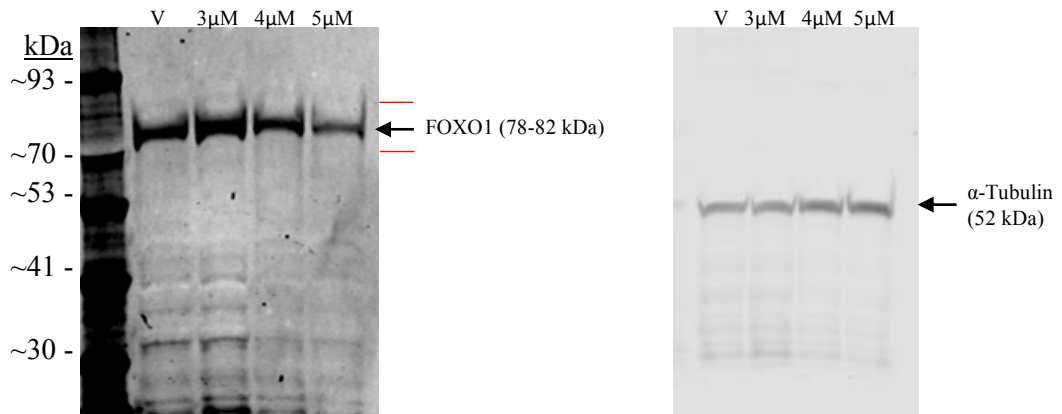

# MDA-MB-157 Figure 3F-G

## Blot29

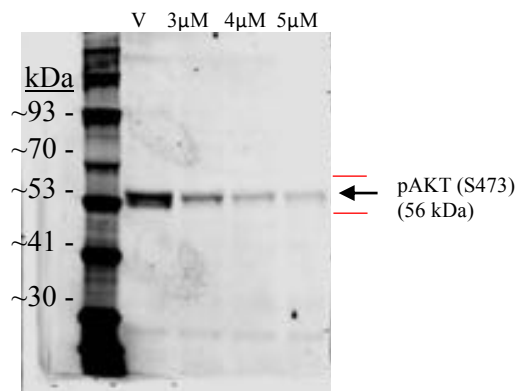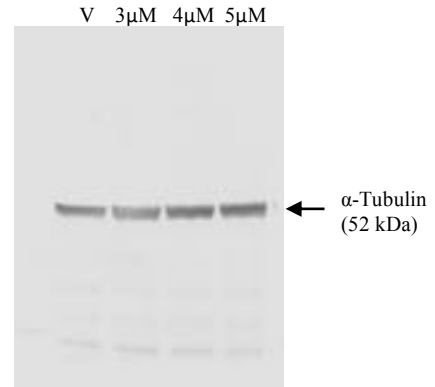

## Blot30

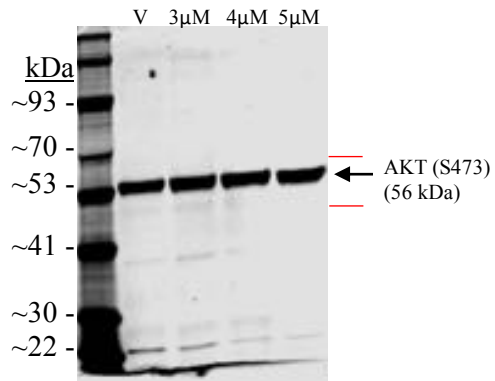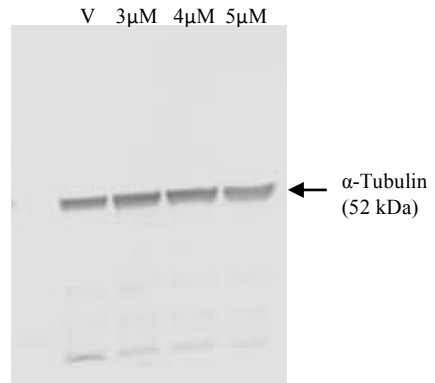

### Blot31

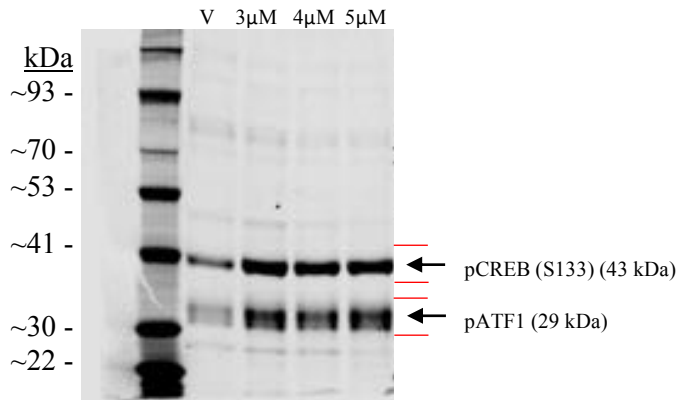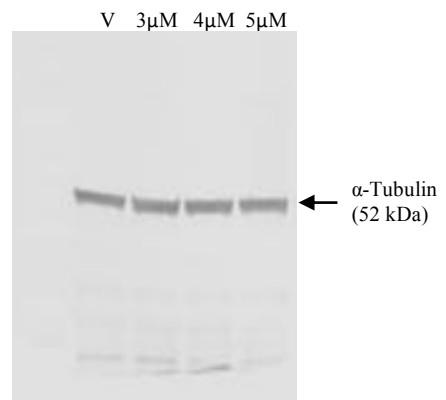

### Blot32

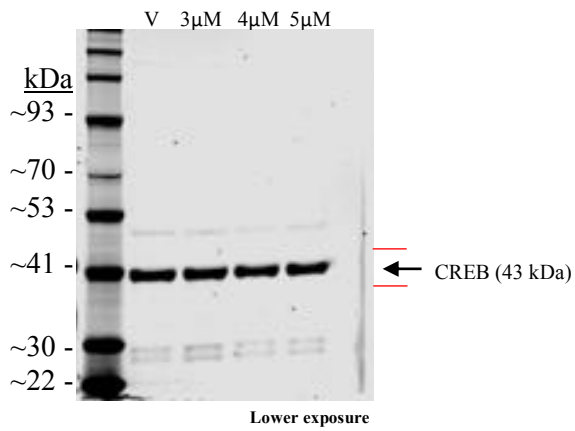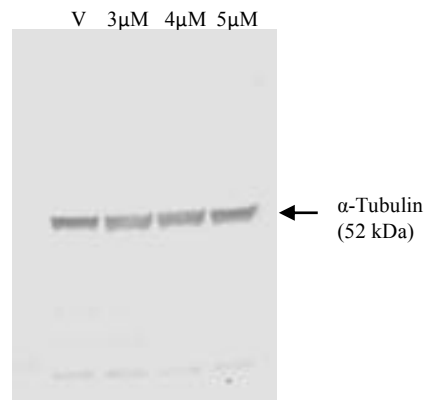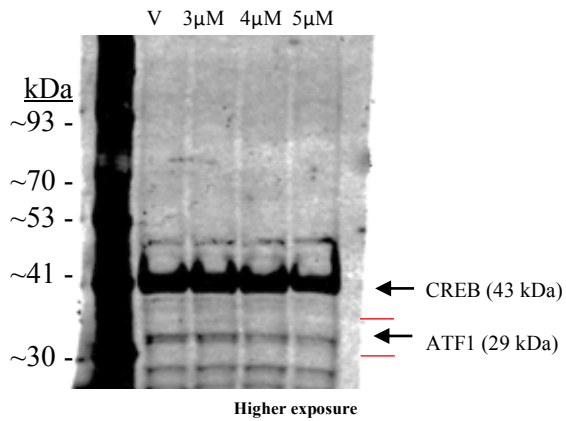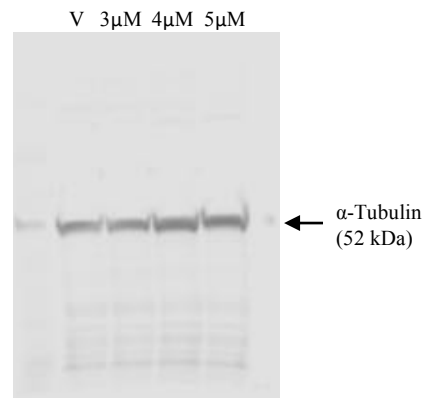

### Blot33

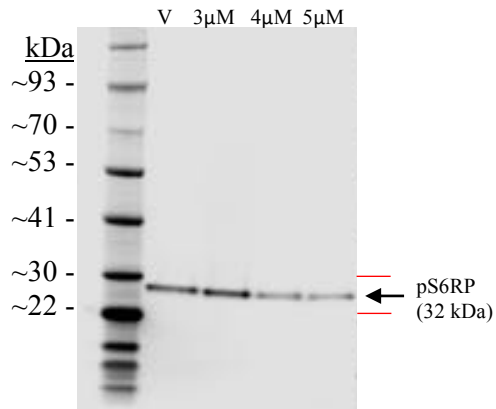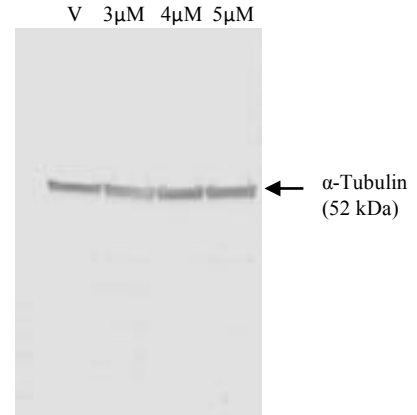

### Blot34

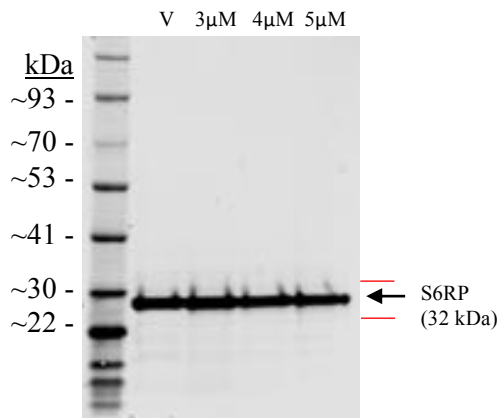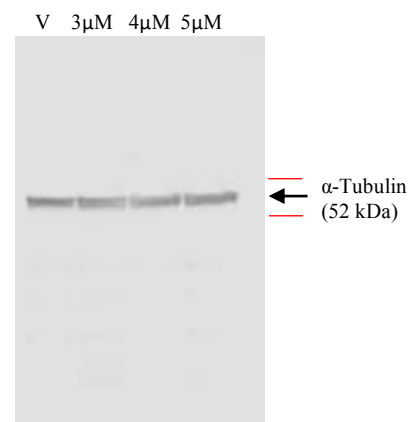

### Blot35

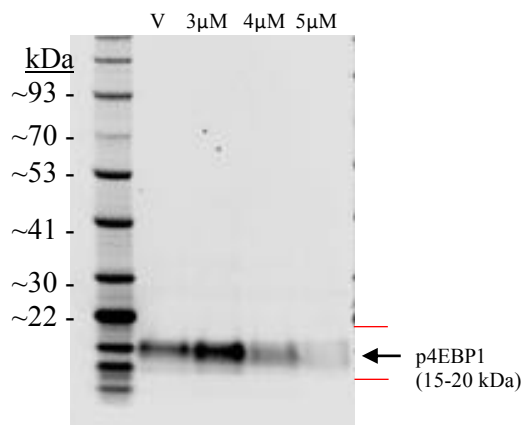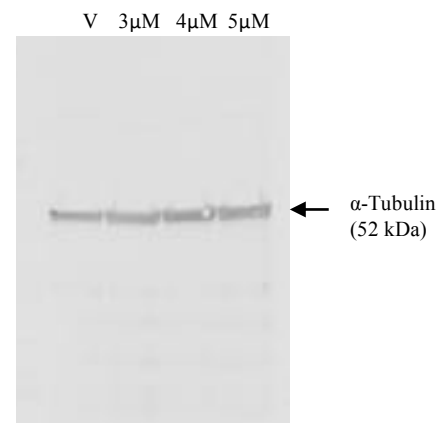

### Blot36

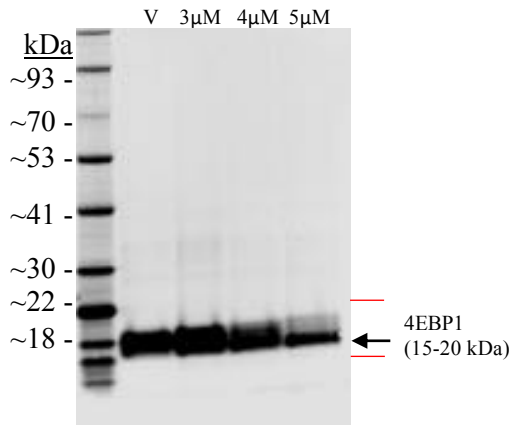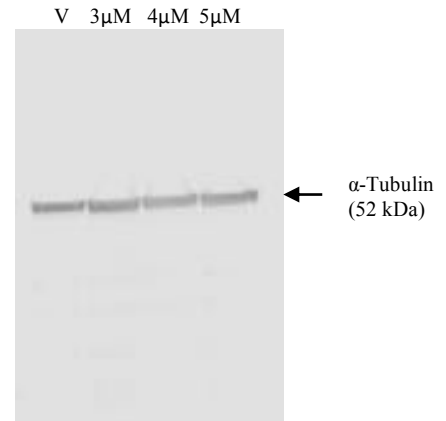

### Blot37

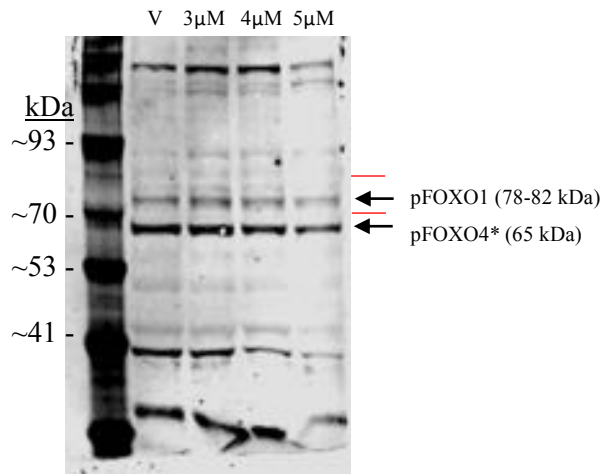

\*antibody also recognizes pFOXO4, which runs slightly below pFOXO1

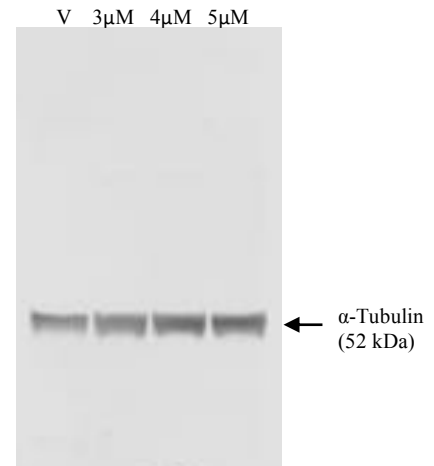

### Blot38

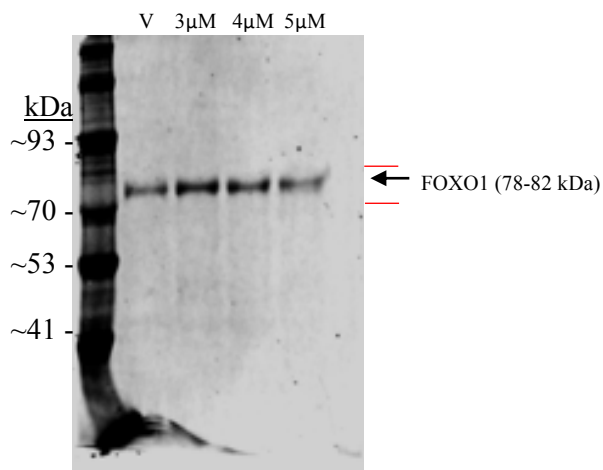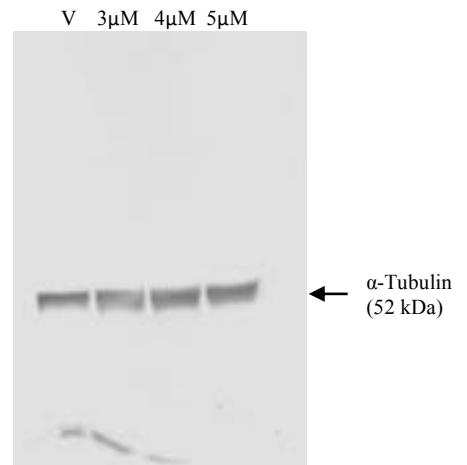

Supplement: 12885_2020_7193_MOESM10_ESM.pdf [file 12885_2020_7193_MOESM10_ESM.pdf]
