# Supplementary material for: Antagonists of the serotonin receptor 5A target human breast tumor initiating cells
Source: PubMed Central journal article supplement (PMC7404930; doi:10.1186/s12885-020-07193-6), 2020-08-05
Supplement: 12885_2020_7193_MOESM3_ESM.pdf [file 12885_2020_7193_MOESM3_ESM.pdf]

**Supplementary Table 1.** Legend key for PPA.

| <b>Coordinate</b> | <b>Target</b>        | <b>Phosphorylation</b>   | <b>Coordinate</b> | <b>Target</b>          | <b>Phosphorylation</b> |
|-------------------|----------------------|--------------------------|-------------------|------------------------|------------------------|
| <b>A-A1, A2</b>   | Reference            | -                        | <b>A-D9, D10</b>  | STAT5a                 | Y694                   |
| <b>A-A3, A4</b>   | p38 $\alpha$         | T180/Y182                | <b>B-D11, D12</b> | p70 S6 Kinase          | T421/S424              |
| <b>A-A5, A6</b>   | ERK1/2               | T202/Y204,<br>T185/ Y187 | <b>B-D13, D14</b> | RSK1/2/3               | S380/S386/S377         |
| <b>A-A7, A8</b>   | JNK 1/2/3            | T183/Y185,<br>T221/ Y223 | <b>B-D15, D16</b> | eNOS                   | S1177                  |
| <b>A-A9, A10</b>  | GSK-3 $\alpha/\beta$ | S21/S9                   | <b>A-E1, E2</b>   | Fyn                    | Y420                   |
| <b>B-A13, A14</b> | p53                  | S392                     | <b>A-E3, E4</b>   | Yes                    | Y426                   |
| <b>B-A17, A18</b> | Reference            | -                        | <b>A-E5, E6</b>   | Fgr                    | Y412                   |
| <b>A-B3, B4</b>   | EGF R                | Y1086                    | <b>A-E7, E8</b>   | STAT6                  | Y641                   |
| <b>A-B5, B6</b>   | MSK1/2               | S376/S360                | <b>A-E9, E10</b>  | STAT5b                 | Y699                   |
| <b>A-B7, B8</b>   | AMPK $\alpha$ 1      | T183                     | <b>B-E11, E12</b> | STAT3                  | Y705                   |
| <b>A-B9, B10</b>  | Akt 1/2/3            | S473                     | <b>B-E13, E14</b> | p27                    | T198                   |
| <b>B-B11, B12</b> | Akt 1/2/3            | T308                     | <b>B-E15, E16</b> | PLC- $\gamma$ 1        | Y783                   |
| <b>B-B13, B14</b> | p53                  | S46                      | <b>A-F1, F2</b>   | Hck                    | Y411                   |
| <b>A-C1, C2</b>   | TOR                  | S2448                    | <b>A-F3, F4</b>   | Chk-2                  | T68                    |
| <b>A-C3, C4</b>   | CREB                 | S133                     | <b>A-F5, F6</b>   | FAK                    | Y397                   |
| <b>A-C5, C6</b>   | HSP27                | S78/S82                  | <b>A-F7, F8</b>   | PDGF R $\beta$         | Y751                   |
| <b>A-C7, C8</b>   | AMPK $\alpha$ 2      | T172                     | <b>A-F9, F10</b>  | STAT5a/b               | Y694/Y699              |
| <b>A-C9, C10</b>  | $\beta$ -Catenin     | -                        | <b>B-F11, F12</b> | STAT3                  | S727                   |
| <b>B-C11, C12</b> | p70 S6 Kinase        | T389                     | <b>B-F13, F14</b> | WNK1                   | T60                    |
| <b>B-C13, C14</b> | p53                  | S15                      | <b>B-F15, F16</b> | PYK2                   | Y402                   |
| <b>B-C15, C16</b> | c-Jun                | S63                      | <b>A-G1, G2</b>   | Reference              | -                      |
| <b>A-D1, D2</b>   | Src                  | Y419                     | <b>A-G3, G4</b>   | PRAS40                 | T246                   |
| <b>A-D3, D4</b>   | Lyn                  | Y397                     | <b>A-G9, G10</b>  | PBS (Negative Control) | -                      |
| <b>A-D5, D6</b>   | Lck                  | Y394                     | <b>B-G11, G12</b> | HSP60                  | -                      |
| <b>A-D7, D8</b>   | STAT2                | Y689                     | <b>B-G17, G18</b> | PBS (Negative Control) | -                      |

Information in this table was accessed via the user manual for ARY003B (R&D Systems) via the weblink:  
[https://www.rndsystems.com/products/proteome-profiler-human-phospho-kinase-array-kit\\_ary003b](https://www.rndsystems.com/products/proteome-profiler-human-phospho-kinase-array-kit_ary003b)
