# Supplementary material for: Antagonists of the serotonin receptor 5A target human breast tumor initiating cells
Source: PubMed Central journal article supplement (PMC7404930; doi:10.1186/s12885-020-07193-6), 2020-08-05

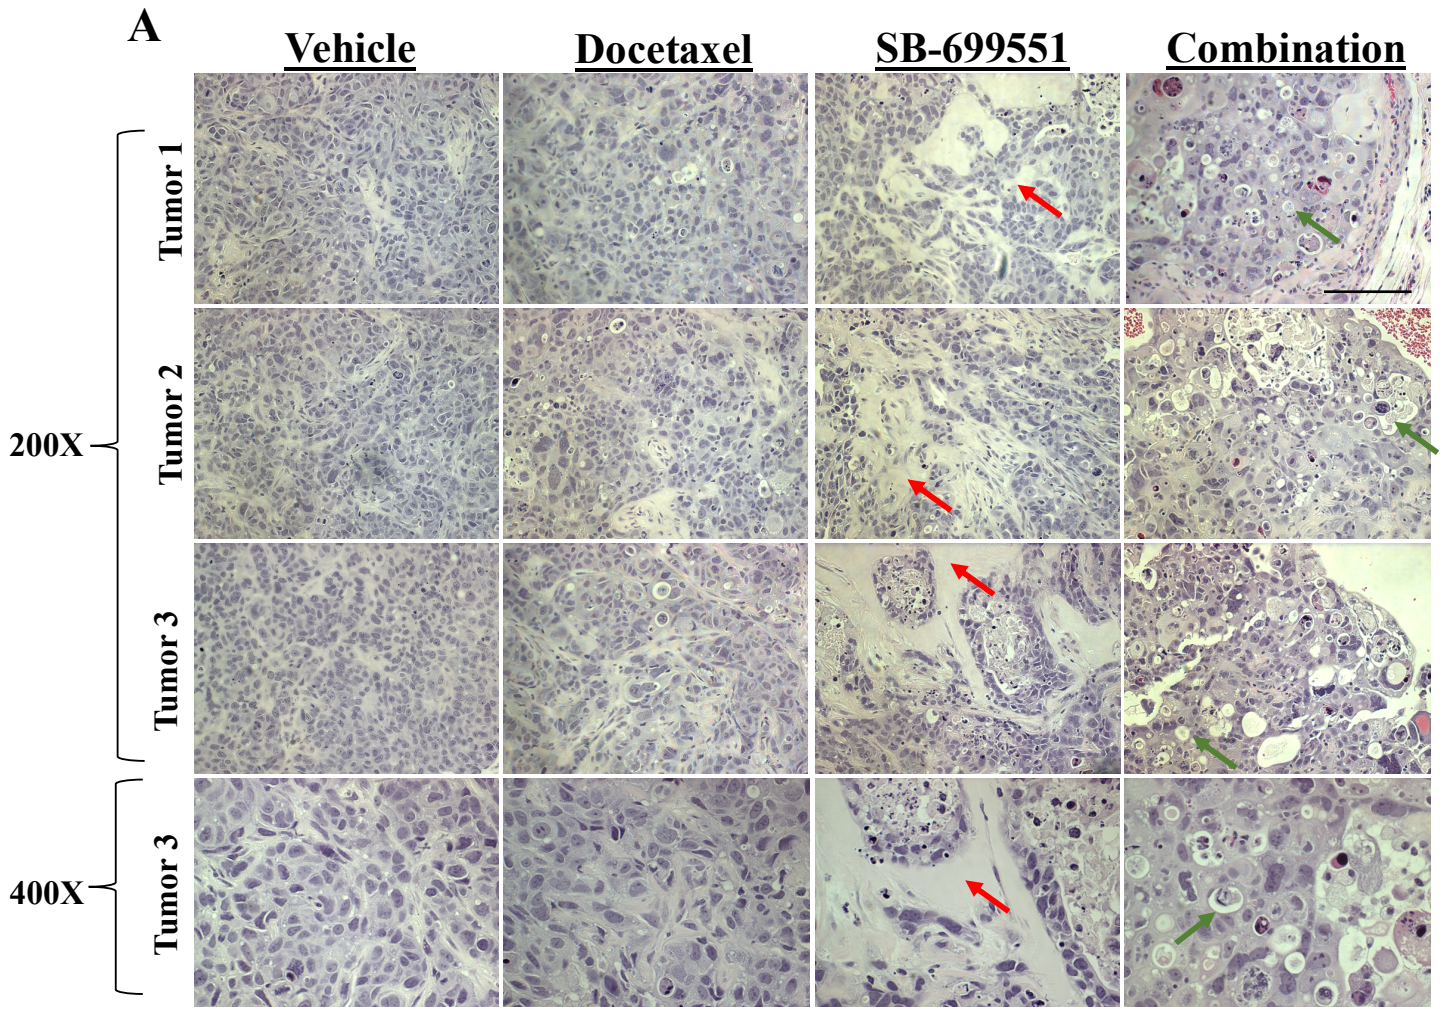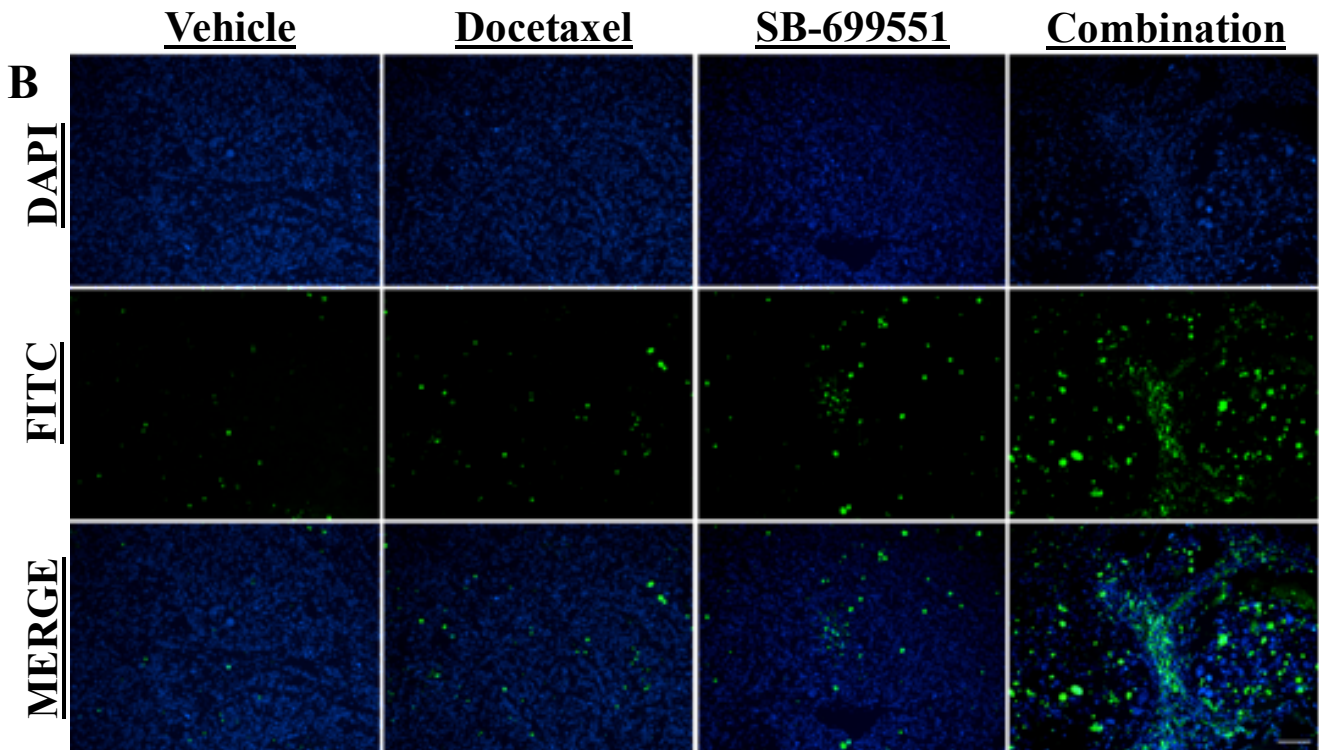

Supplement: 12885_2020_7193_MOESM6_ESM.pdf [file 12885_2020_7193_MOESM6_ESM.pdf]
