# Supplementary material for: Antagonists of the serotonin receptor 5A target human breast tumor initiating cells
Source: PubMed Central journal article supplement (PMC7404930; doi:10.1186/s12885-020-07193-6), 2020-08-05
Supplement: 12885_2020_7193_MOESM9_ESM.pdf [file 12885_2020_7193_MOESM9_ESM.pdf]

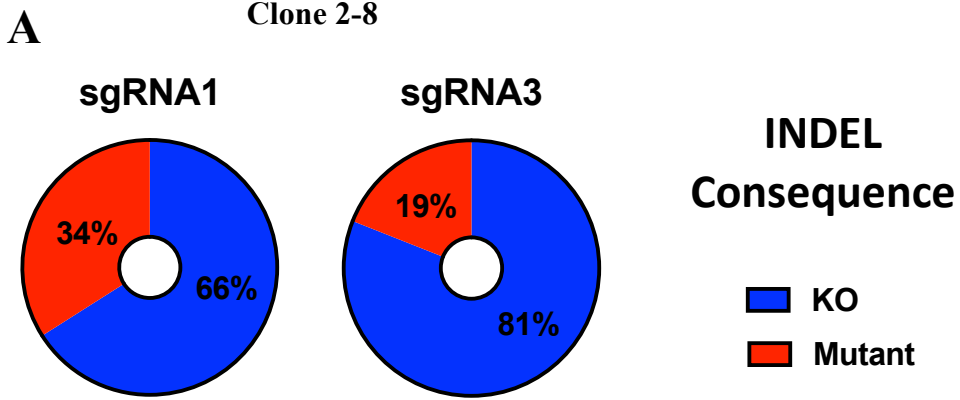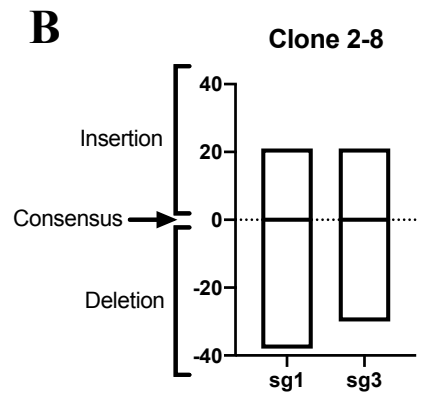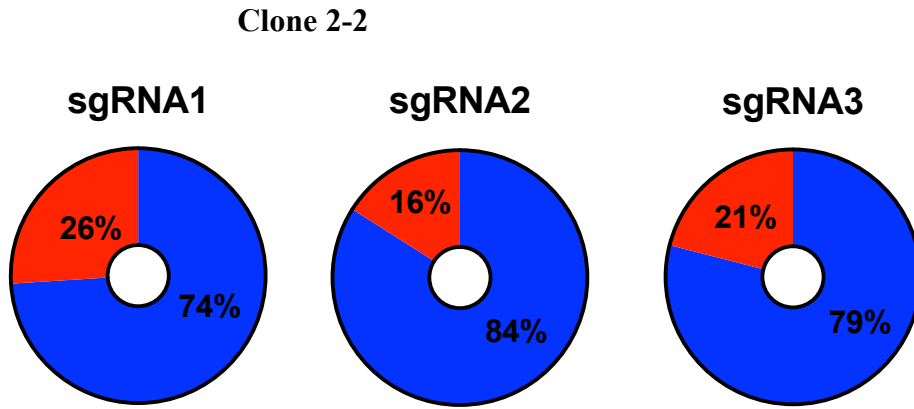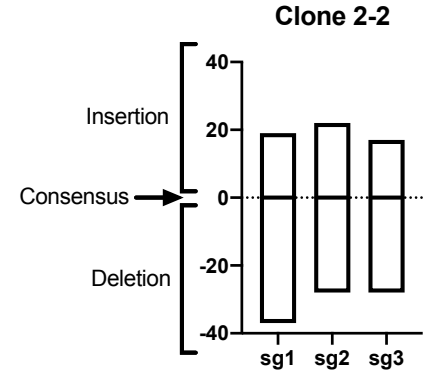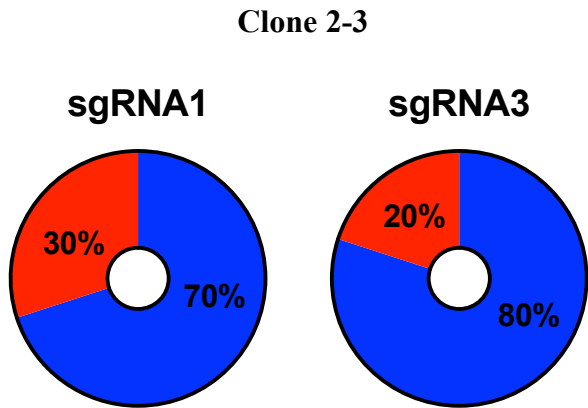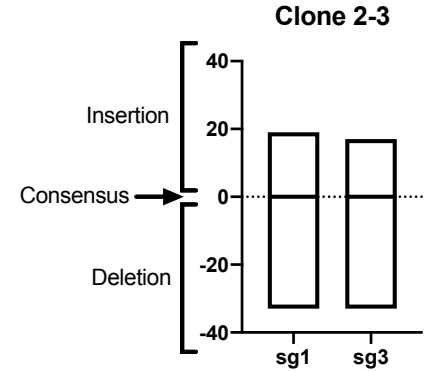

**C**

↓  
 VFGVLILTLLGFLVAATFAWNLLVLATILRVRTFHRVPHNLVASMAVSDVLVAALVMPLSLV **sgRNA1 Amplicon Consensus**  
↑

**IN FRAME MUTANTS:**

- (i) VFGVLILTLLGFLVAATFAWNLLVLATILRVXXXXXXXXPHNLVASMAVSDVLVAALVMPLSLV
- (ii) VFGVLILTLLGFLVAATFAWNLXXXXXXXXXXXXXXXXXXXXXXXXXXXXXXXXLVAALVMPLSLV
- (iii) VFGVLILSLLGFLVAATFAWNLLVLATILXSQQSTTTPMRMPTMRAARCSFCVRTFHRVPHNLVASTAVSDALVAALVMPLSLV

**FRAMESHIFT MUTANTS**

- (iv) VFGVLILTLLGFLVAATFAWNLLVLATILPRWSCR\*AW
- (v) VFGVLILTLLGFLVAATFAWNLLVLATIRRAGHAAEPG
